# Supplementary material
Source: publisher figshare collection journal article supplement (https://tandf.figshare.com/articles/dataset/_/11391192)
Supplement: Supplementary file 2 [file 1]

|                           |                                           |                        |                           |
|---------------------------|-------------------------------------------|------------------------|---------------------------|
| <b>Sample name:</b>       | FBX                                       | <b>Operator:</b>       | SYSTEM                    |
| <b>Data file:</b>         | 2018-04-20 14-38-35+03-00-01.dx           | <b>Injection date:</b> | 2018-04-20 14:39:27+03:00 |
| <b>Instrument:</b>        | HPLC                                      | <b>Location:</b>       | 1                         |
| <b>Inj. volume:</b>       | 5.000                                     | <b>Type:</b>           | Sample                    |
| <b>Acq. method:</b>       | Febux.amx                                 | <b>Sample amount:</b>  | 0                         |
| <b>Processing method:</b> | *LC_MS Sample<br>Purity_DefaultMethod.pmx |                        |                           |

**Manually modified:** None

|                  |               |                       |
|------------------|---------------|-----------------------|
| <b>Column:</b>   |               | <b>Serial number:</b> |
| <b>Diameter:</b> | 0             | <b>Void time:</b>     |
|                  | <b>Length</b> |                       |

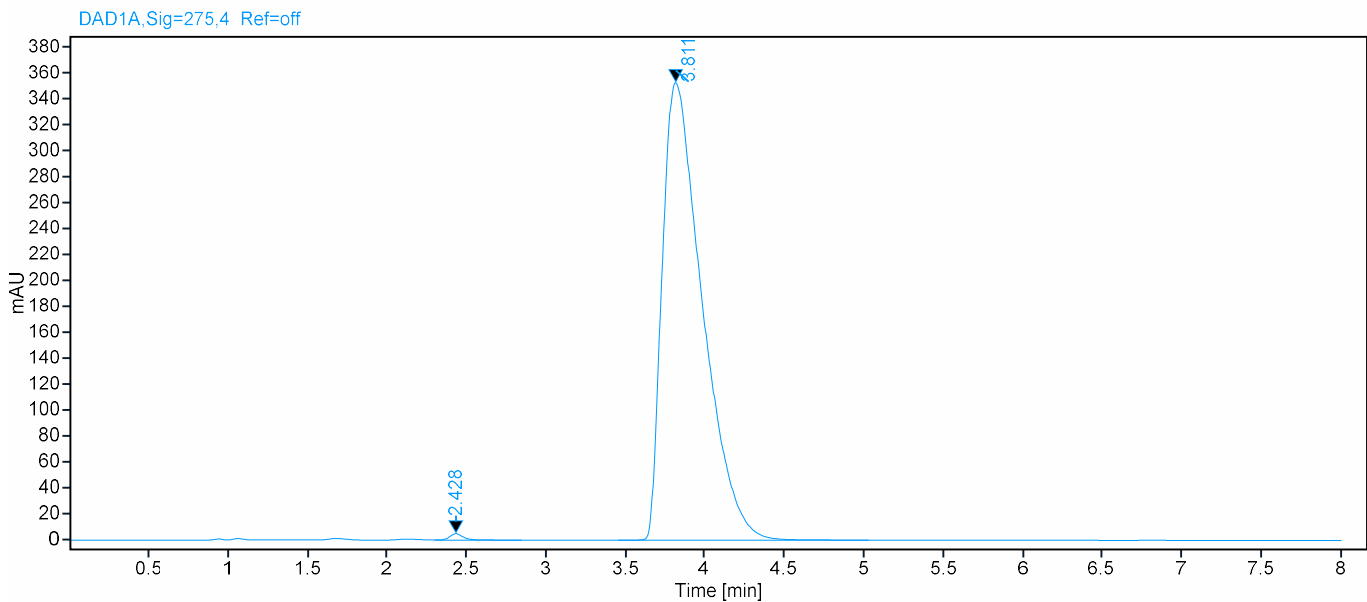

noise calculation: AS 1 M

| Description |    | DAD1A, Sig=275,4 Ref=off |                 |             |       |                 |
|-------------|----|--------------------------|-----------------|-------------|-------|-----------------|
| RT [min]    | k' | Area                     | Symm. (classic) | Width (50%) | Noise | Signal to noise |
| 2.428       |    | 30.62282                 | 0.73            |             |       |                 |
| 3.811       |    | 6171.47939               | 0.47            |             |       |                 |
