# Supplementary material
Source: publisher figshare collection journal article supplement (https://tandf.figshare.com/articles/dataset/_/11391192)

x10<sup>2</sup> +ESI MRM Frag=135.0V CID@20.0 ( 317.1 ->261.1 ) PL02.d

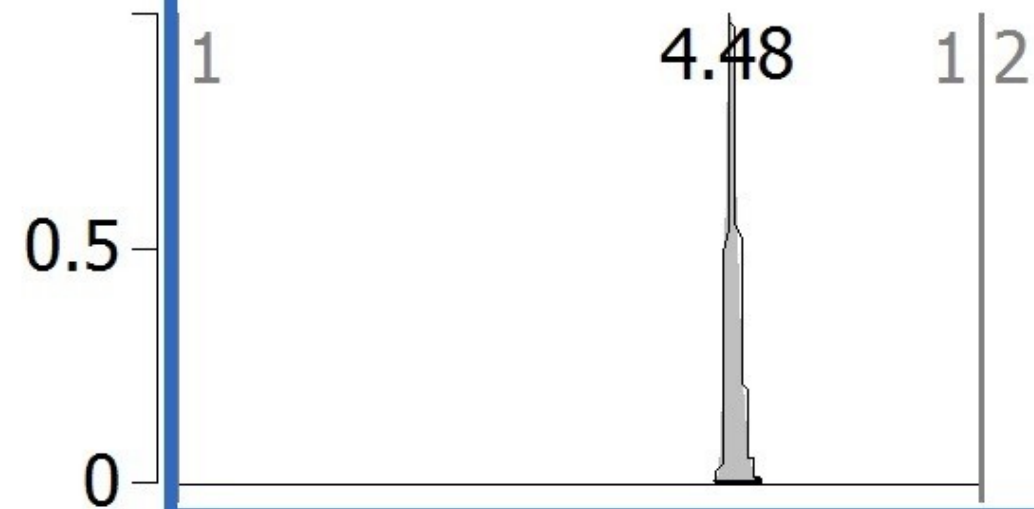

+ESI MRM Frag=135.0V CID@28.0 ( 324.2->262.1 ) PL02.d

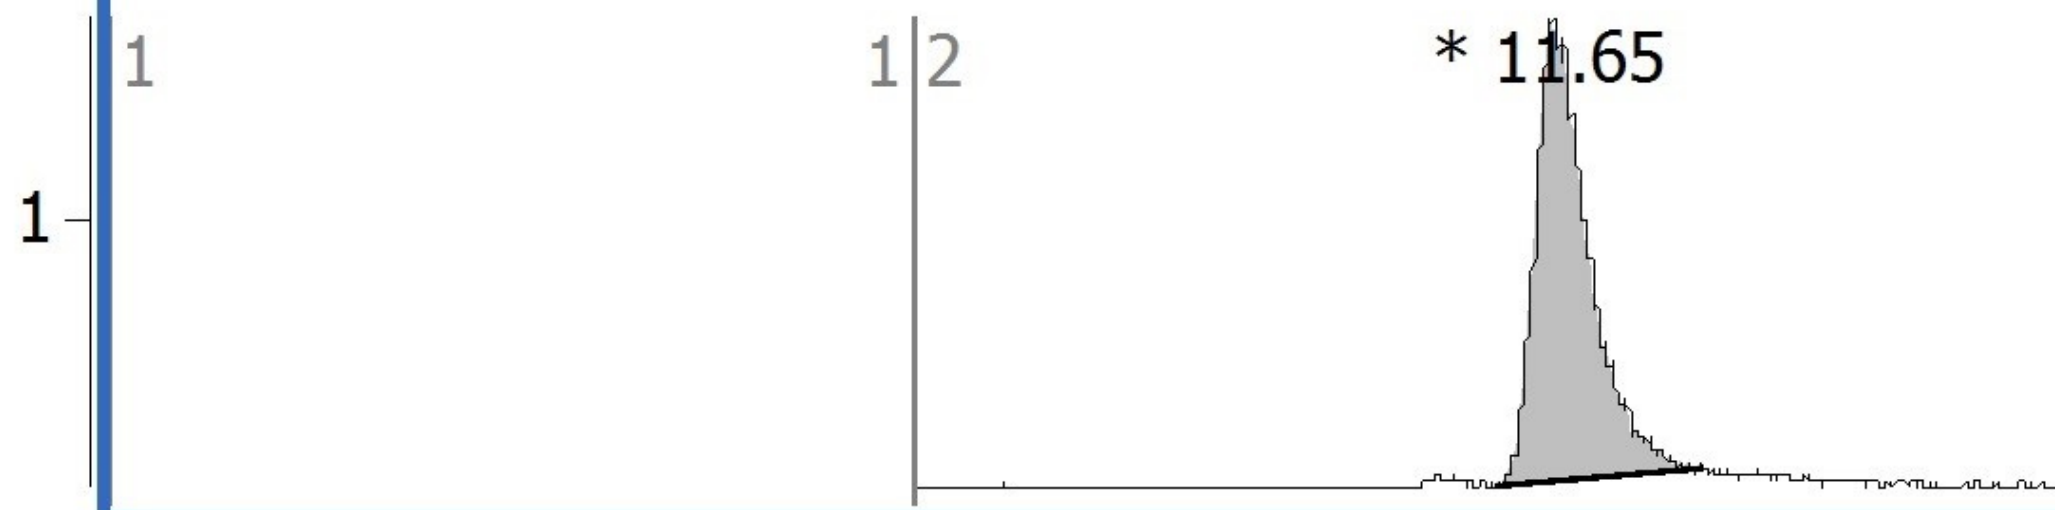

1 2 3 4 5 6 7 8 9 10 11 12 13 14 15

Counts (%) vs. Acquisition Time (min)

Supplement: Supplementary file 1 [file 1]
